# Supplementary material for: miR-335 Restrains the Aggressive Phenotypes of Ovarian Cancer Cells by Inhibiting COL11A1
Source: MDPI journal article supplement (doi:10.3390/cancers13246257), 2021-12-13
Supplement: s1 [file s1]

# miR-335 restrains the aggressive phenotypes of ovarian cancer cells by inhibiting 1 COL11A1 2

Yi-Hui Wu <sup>1, 2</sup>, Yu-Fang Huang <sup>3</sup>, Tzu-Hao Chang <sup>4</sup>, Pei-Ying Wu <sup>5</sup>, Tsung-Ying Hsieh <sup>3 6</sup>, Sheng-Yen Hsiao <sup>7</sup> and Soon-Cen Huang <sup>8#</sup>and Cheng-Yang Chou <sup>9#4</sup>

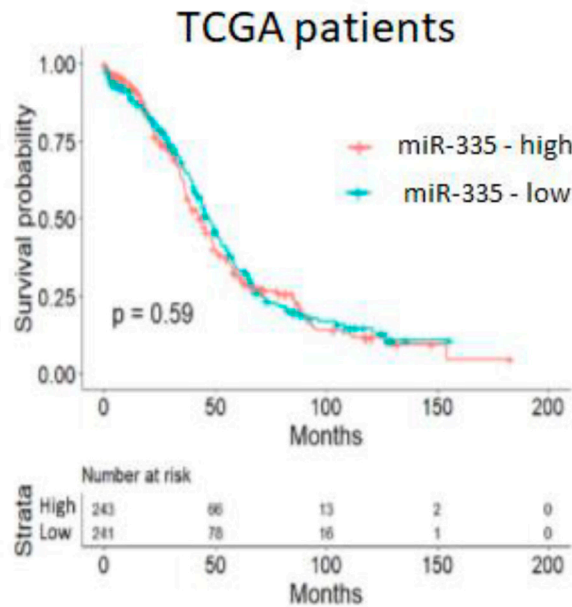

**Figure S1.** Long-term overall survival in the TCGA patients (n= 8 483). Kaplan–Meier curves stratified by the miR-335 mRNA level and assessed by 9 log-rank test are illustrated.

**Table S1.** Complementary oligonucleotides used to construct 12 double-stranded, mutant miR-335-binding sites of COL11A1 3'-UTR or PDK1 13 3'-UTR.

|                          | Sequence                      |
|--------------------------|-------------------------------|
| COL11A1 region 1 (Mut) F | GTAATTATTGGGTGTACAGTTCTATACT  |
| COL11A1 region 1 (Mut) R | AGTATAGAACTGTACACCCAATAATTAC  |
| COL11A1 region 2 (Mut) F | AAAATATTATGCAGGGTGATGCTTTATT  |
| COL11A1 region 2 (Mut) R | AATAAAGCATCACCCTGCATAATATTTT  |
| COL11A1 region 3 (Mut) F | GTTAGATTGGCTTATCAATCAAGTTCTT  |
| COL11A1 region 3 (Mut) R | AAGAAGCTTGATTGATAAGCCAATCTAAC |
| PDK1 (Mut) F             | TGGCTTGGTCATTGTAGGGCGTGGTTGT  |
| PDK1 (Mut) R             | ACAACCACGCCCTACAATGACCAAGCCA  |

**Table S2.** MicroRNA target interactions of COL11A1 gene.

| COL11A1 | microRNA target interactions | miRNAs |
|---------|------------------------------|--------|
|---------|------------------------------|--------|

|              |      |      |
|--------------|------|------|
| <b>3'UTR</b> | 596  | 162  |
| <b>5'UTR</b> | 1238 | 293  |
| <b>CDS</b>   | 8874 | 1744 |

**Table S3.** Top 10 negative correlated microRNAs.

| <b>TCGA_OV_Top10_neg_Cor</b> | <b>Spearman</b> |
|------------------------------|-----------------|
| hsa-miR-508-3p               | -0.557299073    |
| hsa-miR-509-3p               | -0.538068643    |
| hsa-miR-508-5p               | -0.529931704    |
| hsa-miR-125b-1-3p            | -0.510822844    |
| hsa-miR-106b-5p              | -0.510332904    |
| hsa-miR-410-3p               | -0.494012796    |
| hsa-miR-409-3p               | -0.491745859    |
| hsa-miR-1228-5p              | -0.449826617    |
| hsa-miR-101-3p               | -0.446658052    |
| hsa-miR-616-3p               | -0.425184671    |

**Table S4.** MicroRNAs with negative correlation and predicted microRNA target interactions.<sup>26</sup> .

| <b>miRNAs</b>  | <b>MTIs</b> | <b>Correlation with COL11A1 (Spearman)</b> |
|----------------|-------------|--------------------------------------------|
| hsa-miR-509-3p | 4           | -0.538068643                               |
| hsa-miR-30e-5p | 2           | -0.224647756                               |
| hsa-miR-877-5p | 8           | -0.204469492                               |

**Table S5.** Correlations between miR-335 and COL11A1 mRNA 28 levels.

|            | <b>N</b> | <b>miR-335 mRNA level</b> | <b>P</b>        |
|------------|----------|---------------------------|-----------------|
| Non-cancer | 23       | 2306.63 ± 9604.63         | 0.002           |
| Cancerous  | 137      | 182.39 ± 1915.05          |                 |
| COL11A1    | low      | 63                        | 856.06 ± 4289.9 |
|            | high     | 74                        | 3.90 ± 279.43   |

Data was presented as median ±interquartile range(IQR); Data was analyzed by Mann-Whitney U test; COL11A1 level <1446.67 (low) and ≥1446.67(high).

**Table S6.** TCGA data.

| <b>Characteristic</b> | <b>Number of patient</b> |
|-----------------------|--------------------------|
| Stage                 |                          |
| I                     | 1                        |
| II                    | 27                       |
| III                   | 373                      |

|                    |     |
|--------------------|-----|
| IV                 | 80  |
| NA                 | 4   |
| Age                |     |
| ≥54                | 326 |
| <54                | 157 |
| Disease status     |     |
| Alive              | 217 |
| Death              | 268 |
| Debulking surgery  |     |
| Optimal surgery    | 313 |
| Suboptimal surgery | 115 |

**Table S7.** TCGA miRNA data.

|                         | Mean       | Early stage              | Advanced stage           | P adjust | Significant                       |
|-------------------------|------------|--------------------------|--------------------------|----------|-----------------------------------|
| <b>TCGA<br/>miR-335</b> | 197.005268 | 142.29<br>[66.91-196.38] | 106.62<br>[56.16-141.23] | 0.000336 | Downregulated in<br>advance stage |

**Table S8.** TCGA miRNA data.

|                         | Mean        | Advanced stage<br>Optimal debulking<br>surgery | Advanced stage<br>suboptimal<br>debulking surgery | P adjust | Significant     |
|-------------------------|-------------|------------------------------------------------|---------------------------------------------------|----------|-----------------|
| <b>TCGA<br/>miR-335</b> | 153.6643017 | 150.74<br>[52.06-158.26]                       | 161.25<br>[69.68-155.25]                          | 0.5150   | No significance |

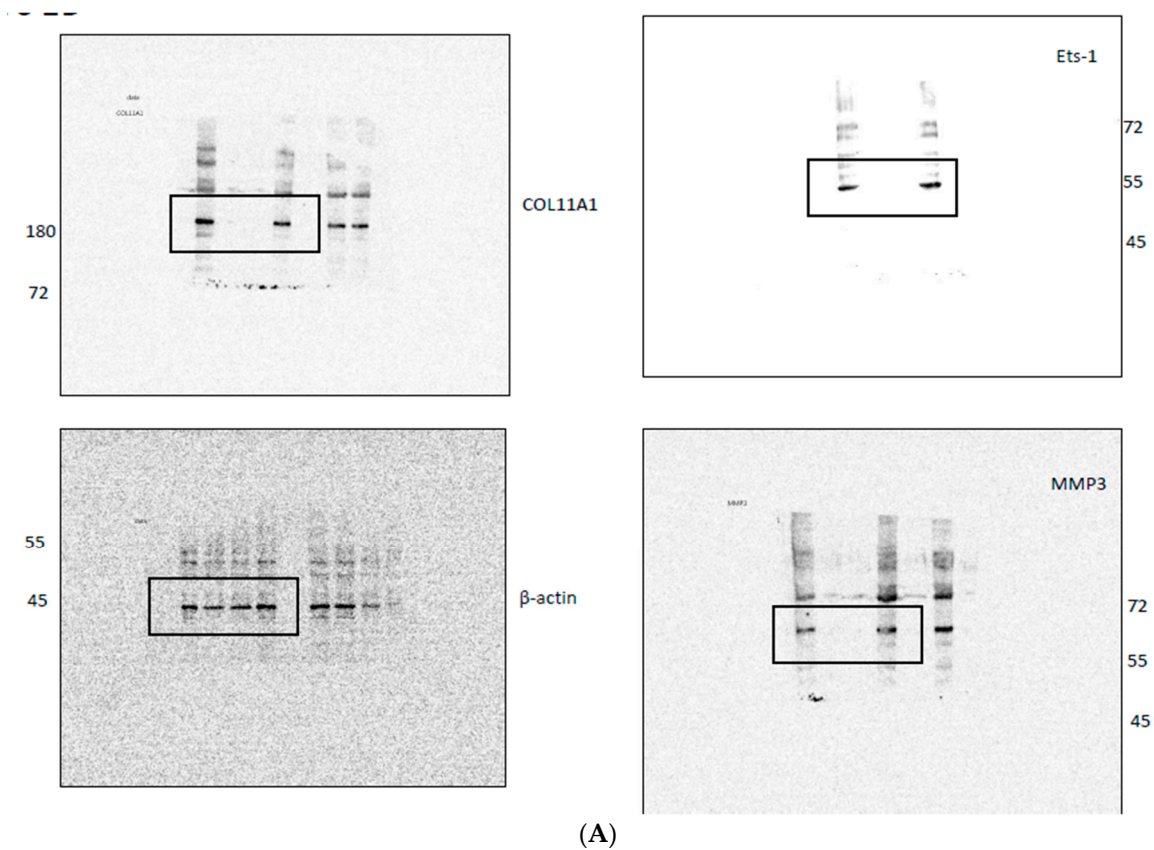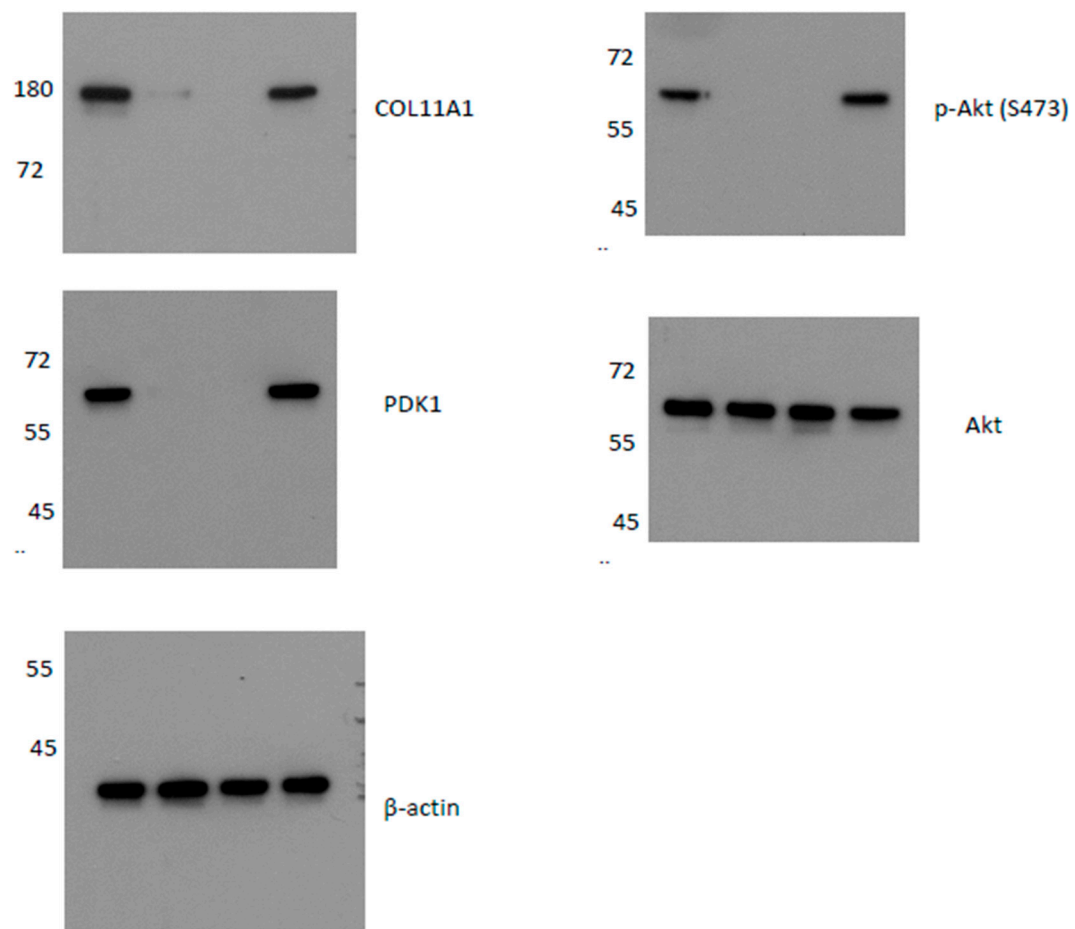

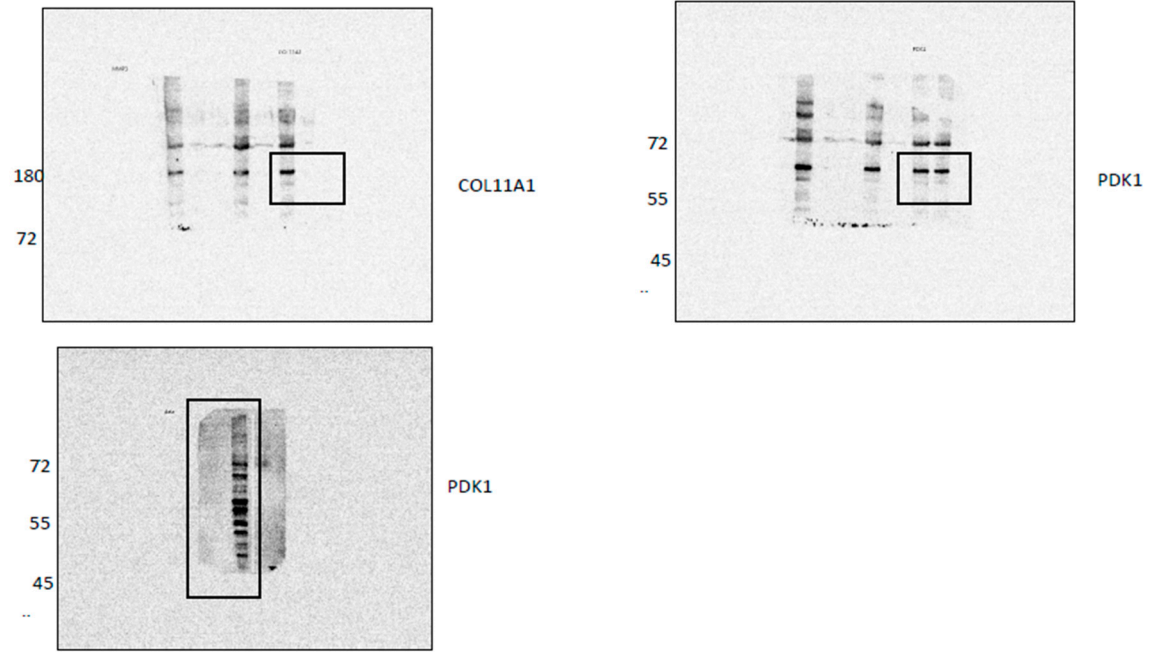

(C)

**Figure S2.** Western blot (A): reference to Figure 2E; (B): reference to Figure 3B; (C): reference to Figure 3D.
